# Supplementary material for: A carbon dot–hemoglobin complex-based biosensor for cholesterol detection
Source: Royal Society of Chemistry journal article supplement (doi:10.1039/c6gc00507a), 2016-01-01
Supplement: c6gc00507a1.pdf [file c6gc00507a1.pdf]

Supporting information  
to  
Carbon dot–hemoglobin complex-based biosensor for cholesterol detection

Trang Thi Bui and Soo-Young Park\*

School of Applied Chemical Engineering, Polymeric Nano Materials Laboratory, Kyungpook National University, Daegu  
41566, Republic of Korea

\*Corresponding author E-mail: psy@knu.ac.kr

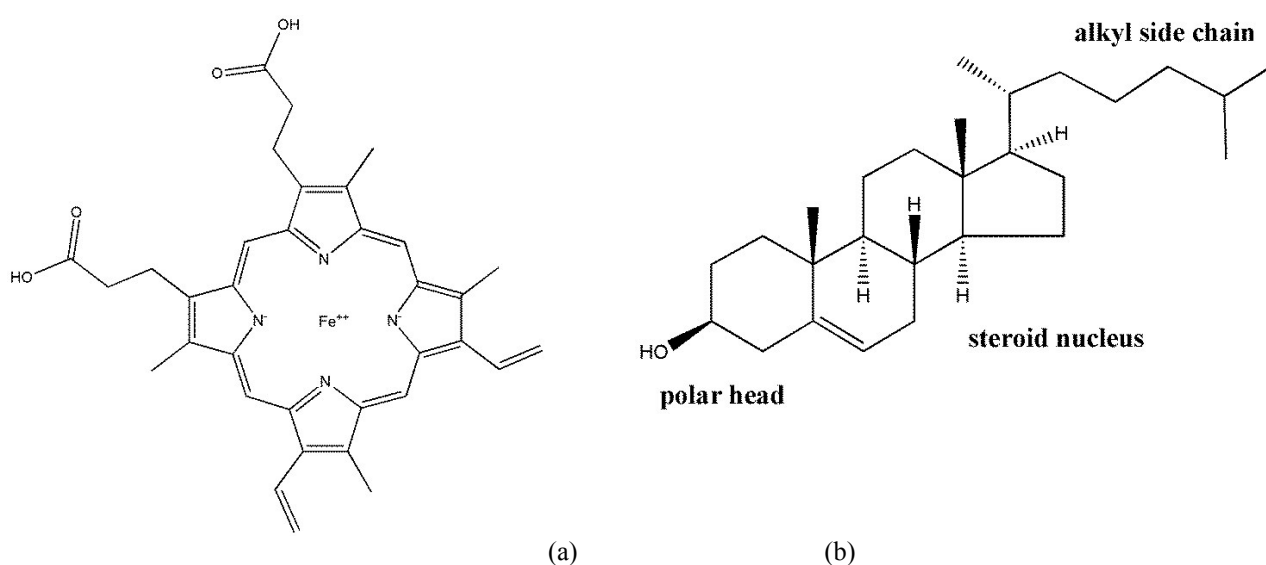

Figure SI 1. Molecular structures of (a) heme and (b) cholesterol.

Table SI 1. The linear range and LOD of different methods of cholesterol detection

| Cholesterol sensor                                  | Type of sensor  | Linear range (mM)              | LOD <sup>a</sup> (mM)                 | Sample type          | References |
|-----------------------------------------------------|-----------------|--------------------------------|---------------------------------------|----------------------|------------|
| ChOx/SPE with PB                                    | Electrochemical | 2–16                           | 1.29                                  | -                    | [1]        |
| ChEt-ChOx/Ufm-Cu <sub>2</sub> O-CS/ITO bioelectrode | Electrochemical | 0.259 – 11.65 (10 – 450 mg/dl) | 0.411 (15.97 mg/dl.c m <sup>2</sup> ) | Human serum          | [2]        |
| Alginate silica/PtOEP/ChOx                          | Fluorimetry     | 1.25–10                        | 1.25                                  | Hypercholesterolemia | [3]        |
| CdSe/Zn quantum dots                                | Fluorimetry     | 0–9.1                          | 0.01                                  | -                    | [4]        |
| CD/Hb                                               | Fluorimetry     | 0–0.8                          | 0.056                                 | Human serum          | This work  |

LOD<sup>a</sup> : limit of detection.

ChOx/SPE with PB: Cholesterol oxidase/ screen-printed electrode with Prussian blue

ChEt-ChOx/Ufm-Cu<sub>2</sub>O-CS/ITO bioelectrode: Cholesterol esterase-cholesterol oxidase/ Ultrafine monodispersed cuprous oxide-chitosan/ indium tin-oxide.

Alginate silica/PtOEP/ChOx: Alginate silica/oxygen sensitive metallo-porphyrin/cholesterol oxidase biosensor.

References

1. Ramírez-Silva, et al., *Behavior of Two and Three Electrode Configuration and Different Mediators in Working Electrode on Development of Disposable Screen-Printing Biosensors for Determination of Free Cholesterol*. Journal of the Mexican Chemical Society, 2013. **57**(1): p. 47-53.
2. Singh, J., et al., *Bienzyme-Functionalized Monodispersed Biocompatible Cuprous Oxide/Chitosan Nanocomposite Platform for Biomedical Application*. The Journal of Physical Chemistry B, 2013. **117**(1): p. 141-152.
3. Prasad, J., et al., *Cholesterol biosensors based on oxygen sensing alginate-silica microspheres*. Biotechnology and Bioengineering, 2011. **108**(9): p. 2011-2021.
4. Kim, K.-E., T. Kim, and Y.-M. Sung, *Fluorescent cholesterol sensing using enzyme-modified CdSe/ZnS quantum dots*. Journal of Nanoparticle Research, 2012. **14**(10): p. 1-9.
